# Supplementary material for: Evolutionary Plasticity of Polycomb/Trithorax Response Elements in Drosophila Species
Source: PLOS journal article supplement (doi:10.1371/journal.pbio.0060261), 2008-10-24
Supplement: S1 (10.1371/journal.pbio.0060261.s001) [file journal.pbio.0060261.s001]

# Max d closest gene distance Cytological BXC and ANT-C PREs

# location

33 CG18812 0 43E12--13

33 Ubx 23302 89D6--9 bxd PRE

36 chic 0 26A5--B2

40 abd-A 0 89E2 iab2 PRE

44 CG14503 1576 55C2

46 fas 0 50B6--C3

53 Ubx 0 89D6--9 bx PRE

58 Antp 41000 84A6--B2 ANT-C PRE (at 15kb)

59 scrib 0 97B9--C1

59 prod 2209 56A2

62 slou 4046 93E4

64 rib 0 56C6

69 CG10814 10099 50A3

71 Rx 0 57B4

74 kni 0 77E3

77 CG5070 0 15F3

77 Abd-B 0 89E4--5 Abd-B intron PRE

78 CG12814 1206 85F16

80 Tl 11266 97D2

80 CG14830 0 65E9--10

80 CG31369 0 85A1

87 abd-A 0 89E2 iab3/abd-A promoter

89 CG32169 0 73E5--6

89 cad 0 38E9--10

94 Nedd4 0 74D2--3

106 Prat2 7351 65D2--3

116 mbl 0 54B1--5

130 dpr 0 57B1--2

135 noc 0 35B2

136 ninA 42889 67E7

141 CG4774 1578 96E10

143 CG10570 9376 37A4

144 eya 0 26E1--2

145 tll 0 100A6

154 HGTX 2235 70E3

169 CG31246 1238 90C6--7

172 Shab 0 63A1--2

215 CG17048 9297 50A3

215 CG7552 470 88D1

228 CG32336 7952 61F1

257 salm 127 32F1--2

258 pnr 0 89A13--B1

260 hth 0 86C1--3

269 H15 5442 25E1

278 nAcRalpha-96Aa 0 96A1--2

305 CG10998 7827 19E7

311 Antp 1080 84A6--B2 Antp P1 PRE

329 CG32698 0 9A2

340 rdgA 211 8B8--C3

346 en 0 47F17--48A1

352 CG3394 7 60C6

380 bi 0 4C3--4

424 eve 0 46C10

433 CG32465 7463 84D10

440 B-H2 33681 16A1

448 CG1340 8050 100A3

563 NPC1b 0 19E5

574 CG33182 0 49F7

675 CG1139 4683 62B12

718 Dr 6263 99B3

754 CG5142 8246 34A5

869 mbl 0 54B1—5
