# Supplementary material for: Evolutionary Plasticity of Polycomb/Trithorax Response Elements in Drosophila Species
Source: PLOS journal article supplement (doi:10.1371/journal.pbio.0060261), 2008-10-24
Supplement: S4 (10.1371/journal.pbio.0060261.s004) [file journal.pbio.0060261.s004]

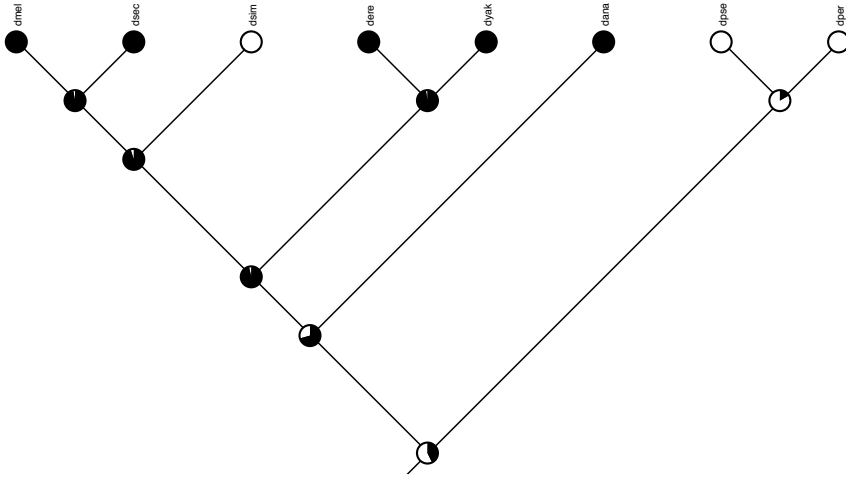

Figure 3: 2R:8420990-8421599 vg

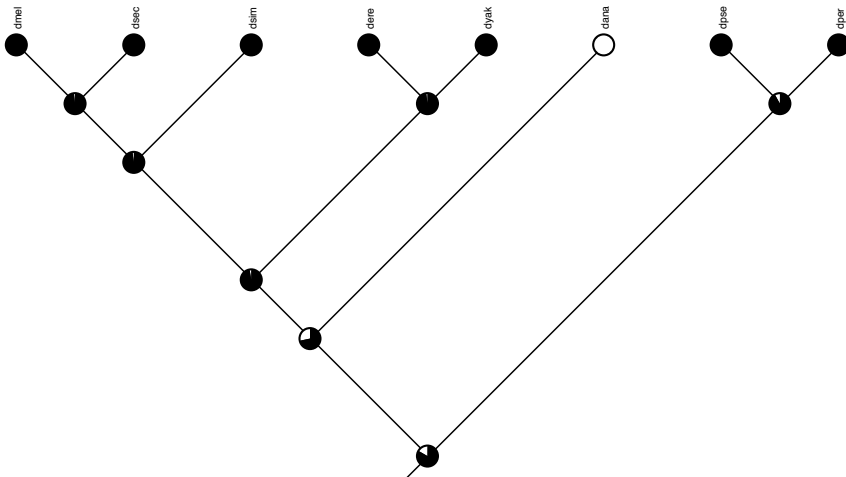

Figure 4: 2R:8881080-8881779 CG10814

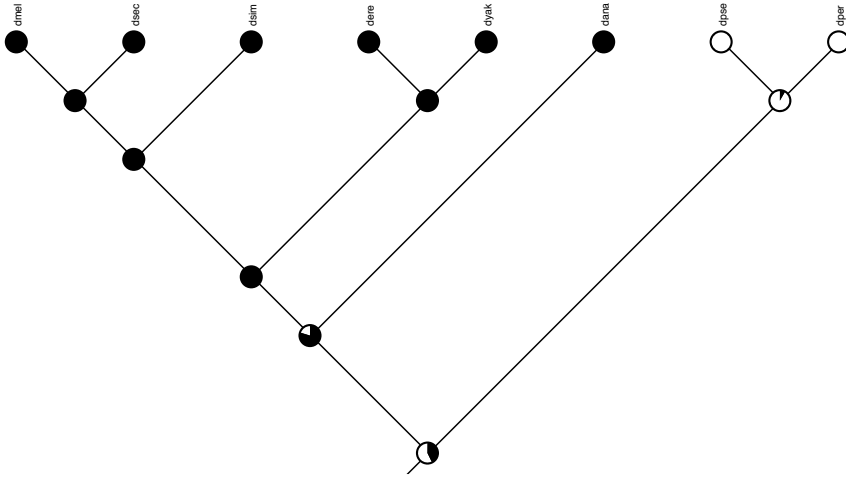

Figure 5: 2R:10473680-10474479 aPKC

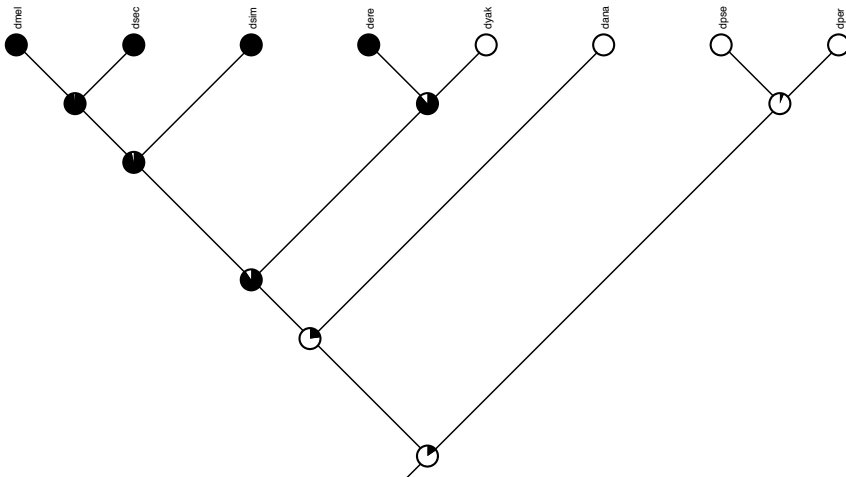

Figure 6: 2R:11793210-11793899 cato

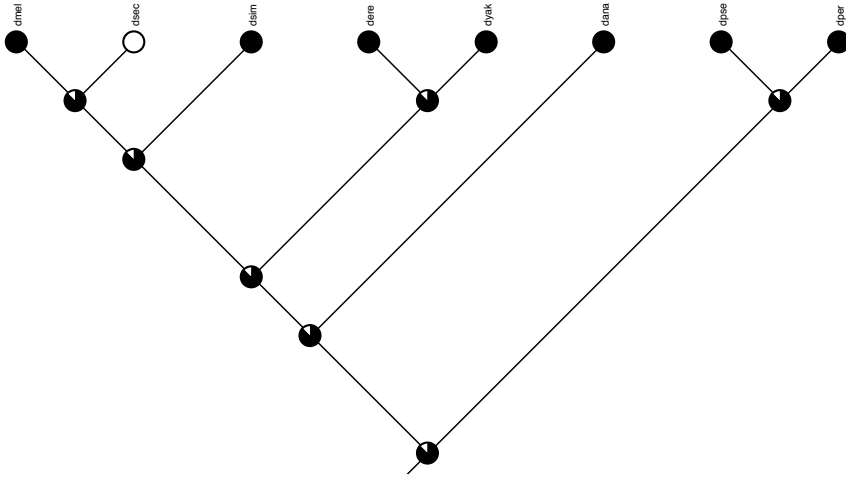

Figure 7: 2R:14793480-14794009 rib

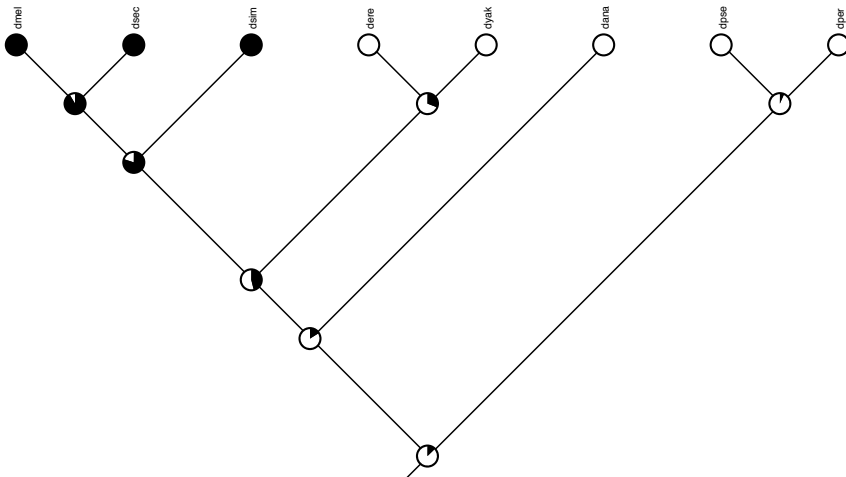

Figure 8: 2R:15953920-15954439 CG33041

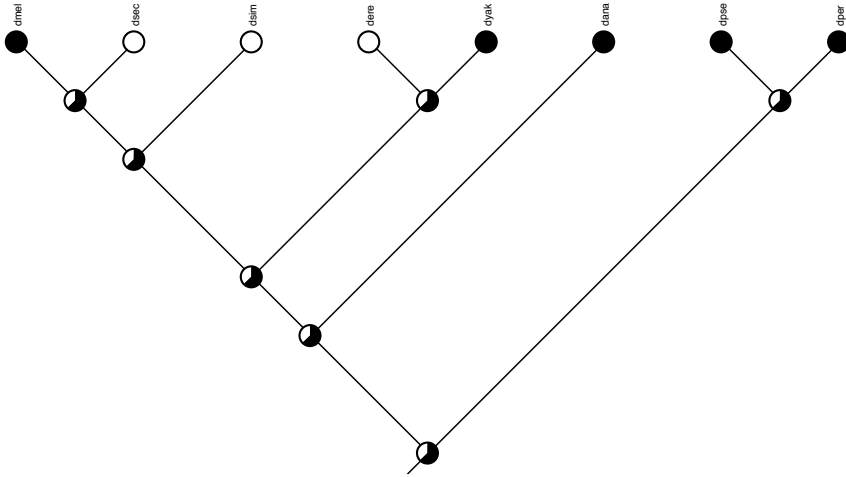

Figure 9: 2R:16738130-16738749 CG18375

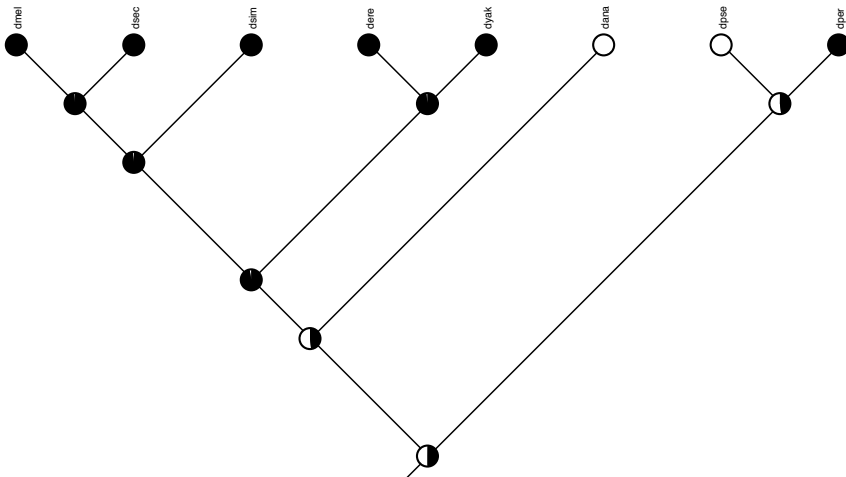

Figure 10: 2R:16861560-16862379 cv-2

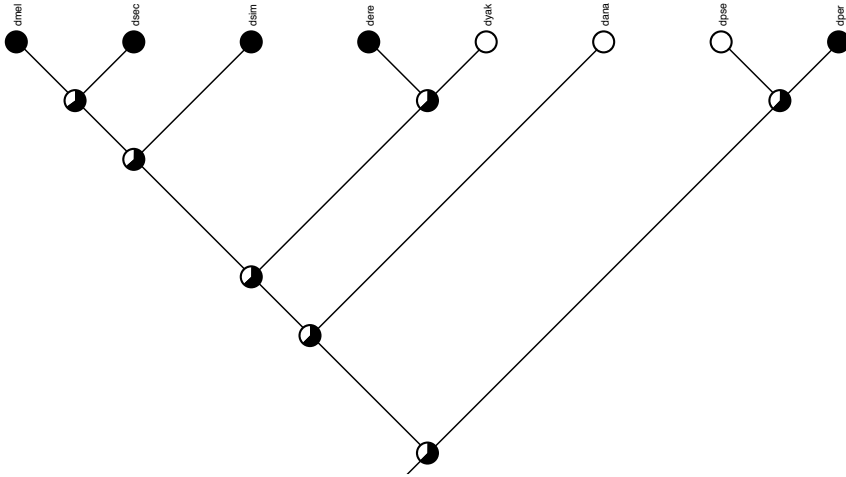

Figure 11: 2R:18506210-18506809 CG9896

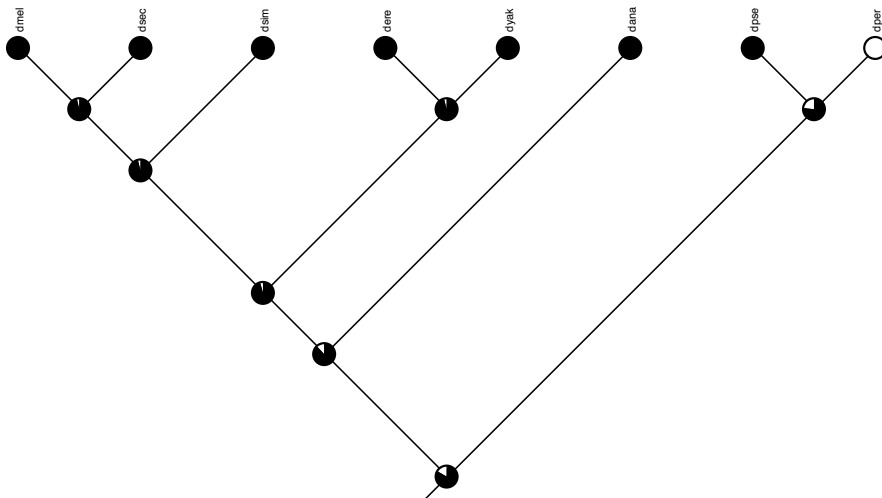

Figure 12: 2L:2093620-2094269 dpr3

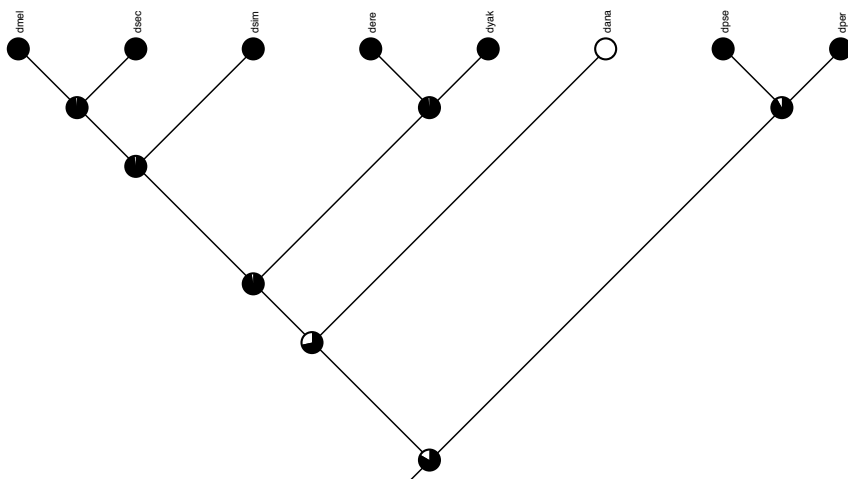

Figure 13: 2R:19805730-19806469 CG3394

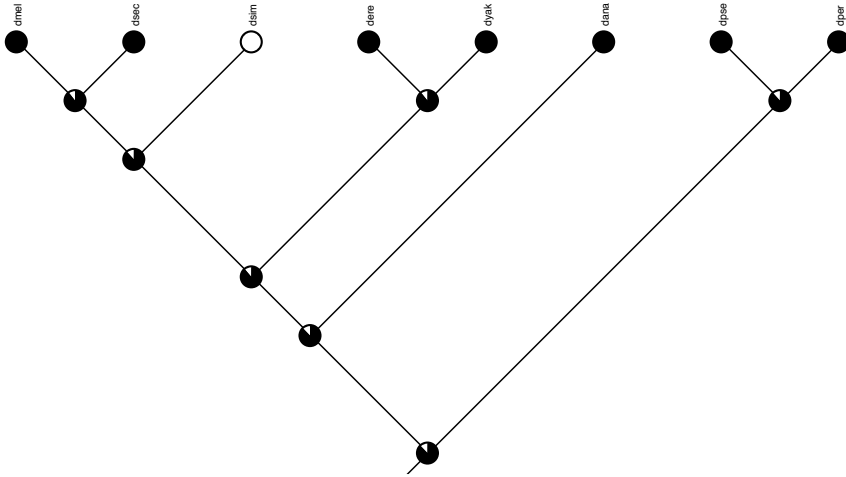

Figure 14: 2R:20353010-20353629 CG3650

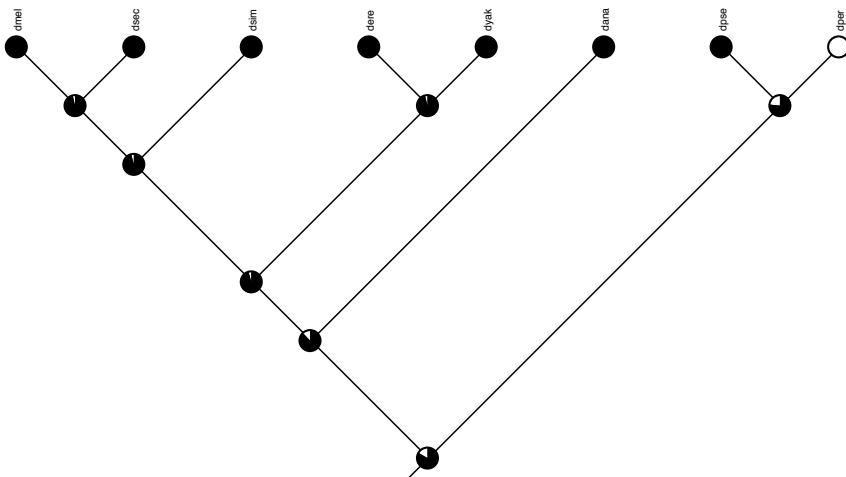

Figure 15: 3L:1962500-1963109 CG1139



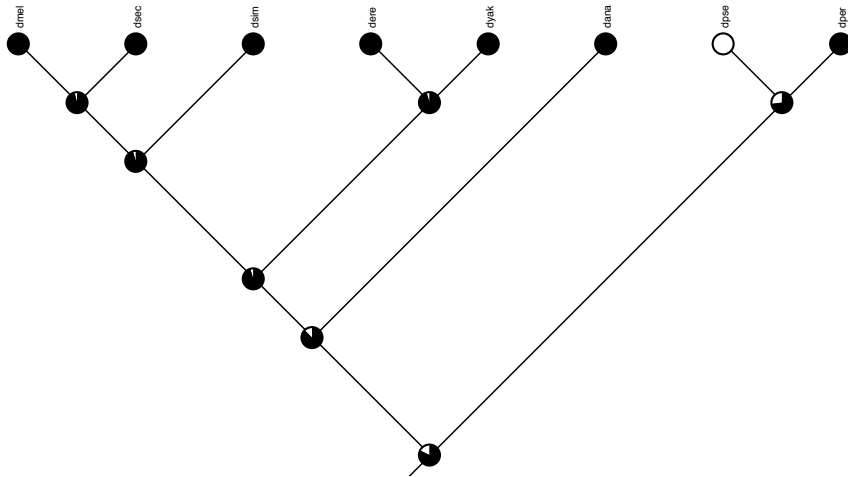

Figure 16: 3L:6090680-6091459 Ets65A

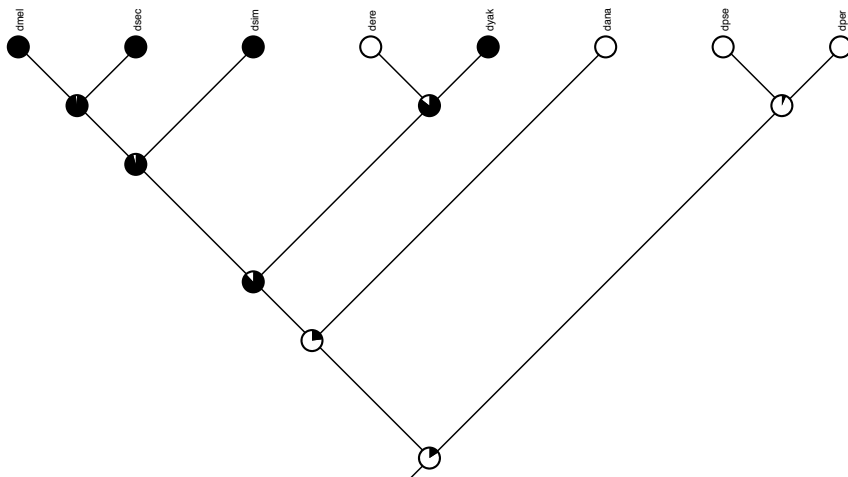

Figure 17: 3L:6788690-6789399 vvl



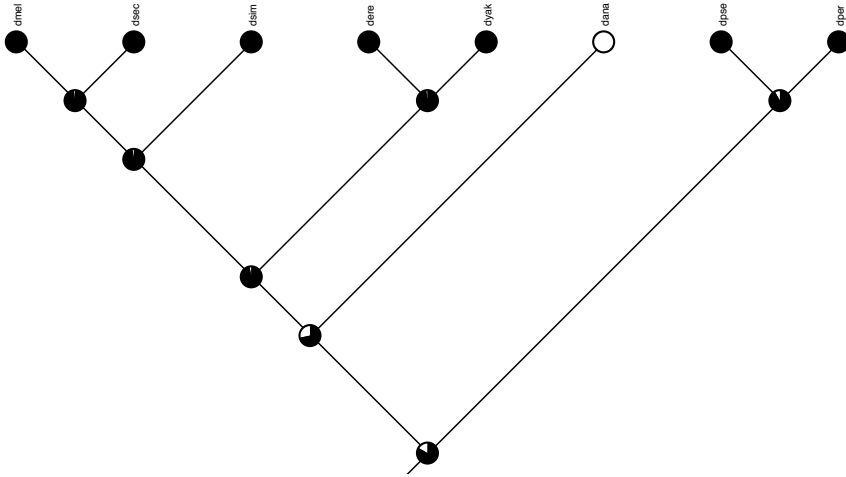

Figure 20: 3L:17094070-17094869 CG32169

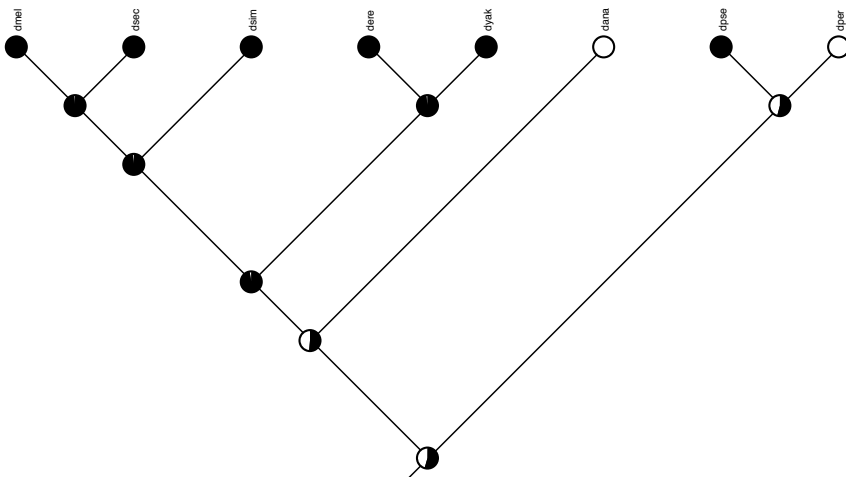

Figure 21: 3L:17100230-17100989 CG32169

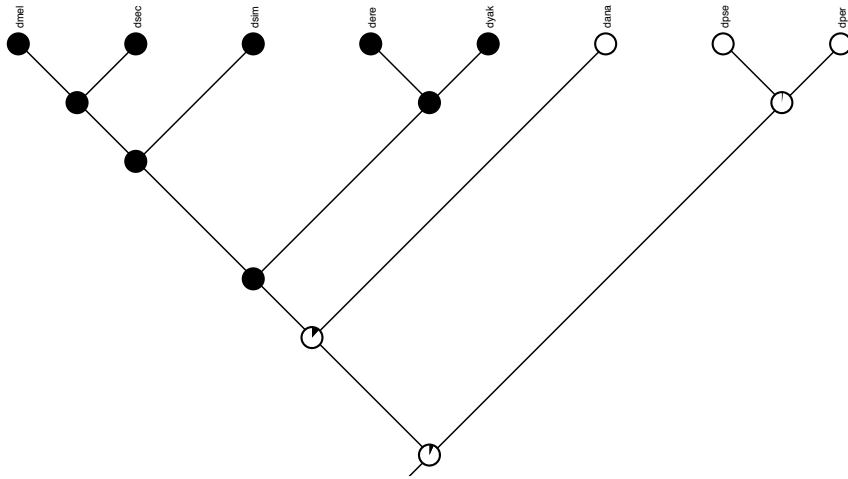

Figure 22: 3L:17499420-17500219 Nedd4

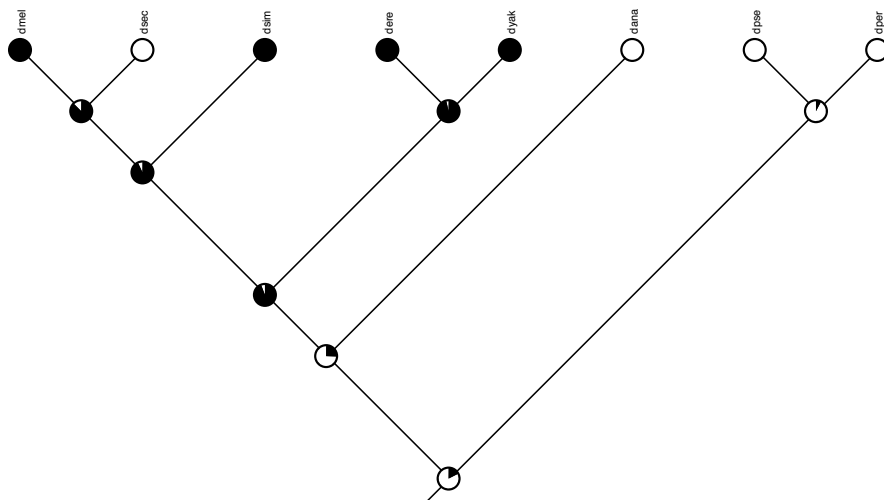

Figure 23: 2L:12011160-12011919 Rh5

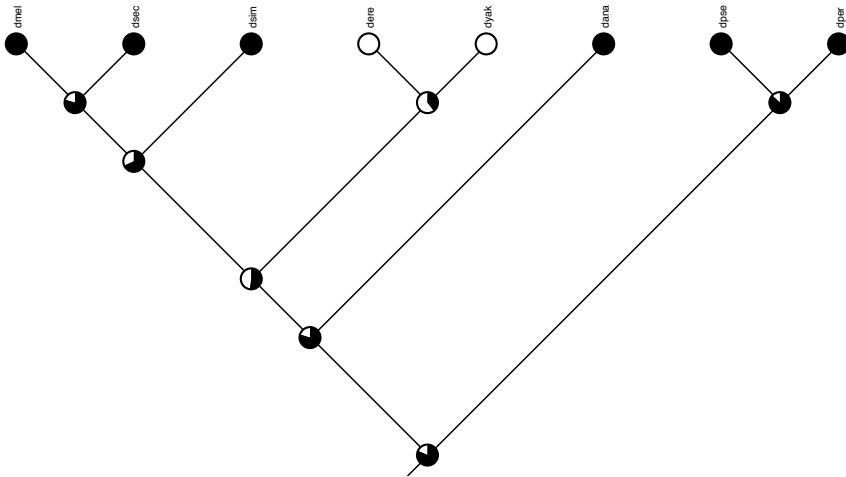

Figure 24: 3L:17650650-17651389 Ccn



Figure 25: 3L:19499760-19500609 CG9299



Figure 26: 3L:20629150-20629879 kni

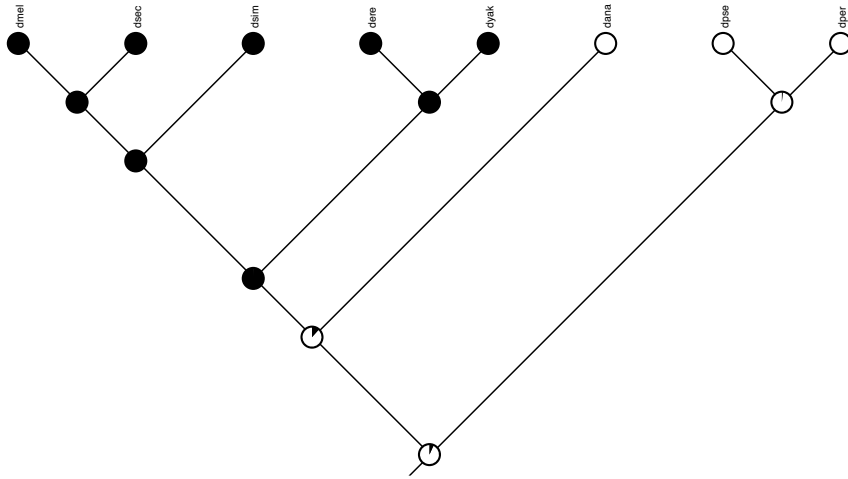

Figure 27: 3L:22249520-22250419 Ten-m

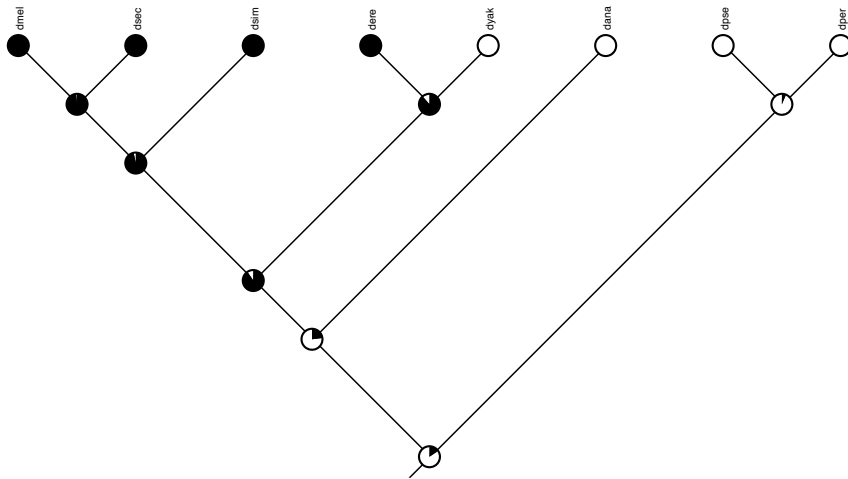

Figure 28: 3R:1108260-1108759 l(3)82Fd

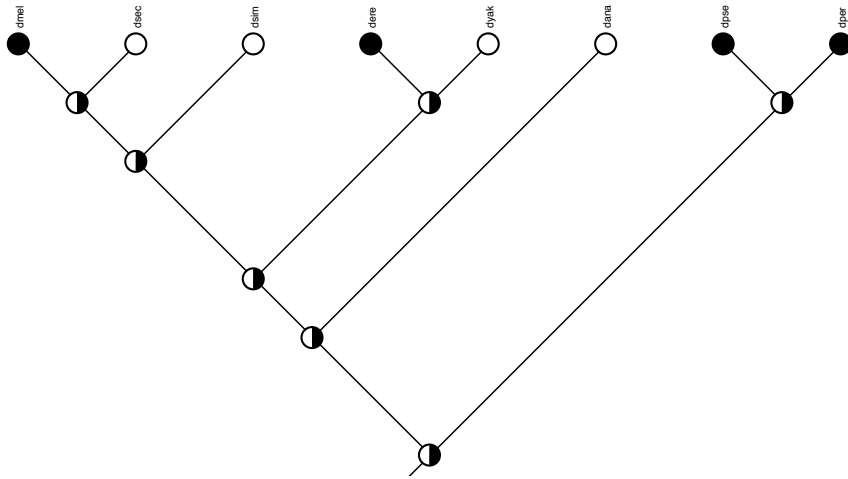

Figure 29: 3R:2356480-2357099 dpr11

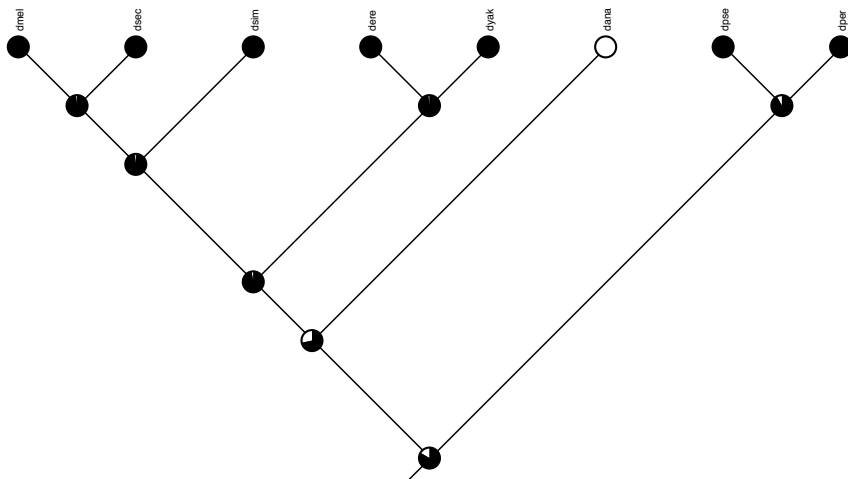

Figure 30: 3R:2826030-2826889 Antp



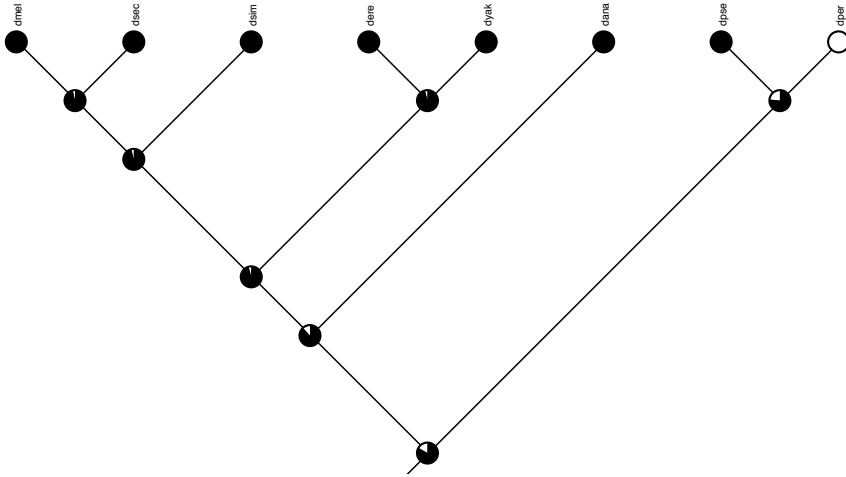

Figure 31: 3R:3414450-3415189 CG32465

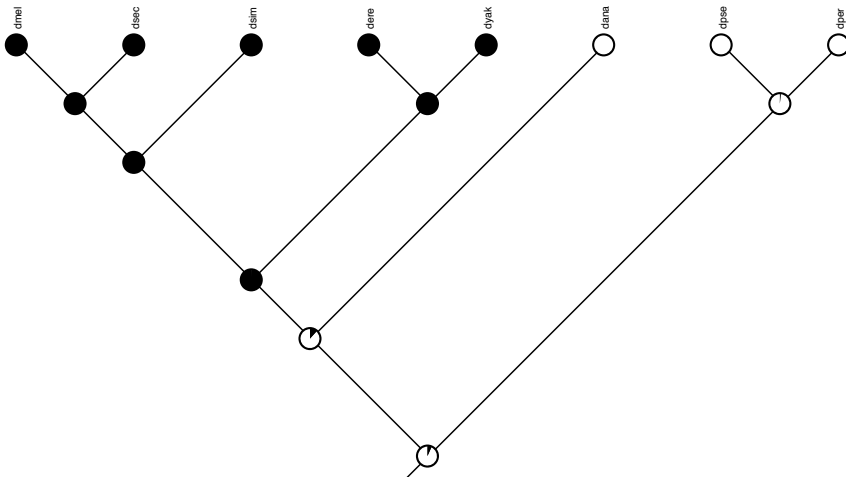

Figure 32: 3R:4528660-4529189 CG8112

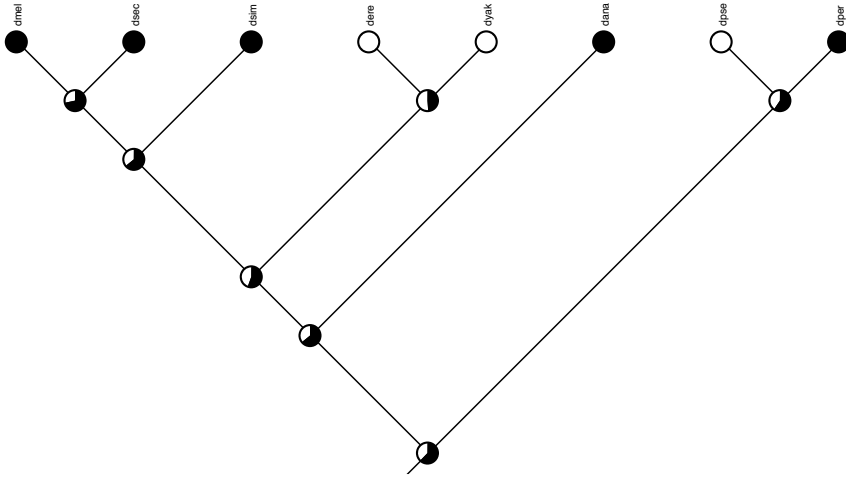

Figure 33: 3R:5058020-5058839 pum

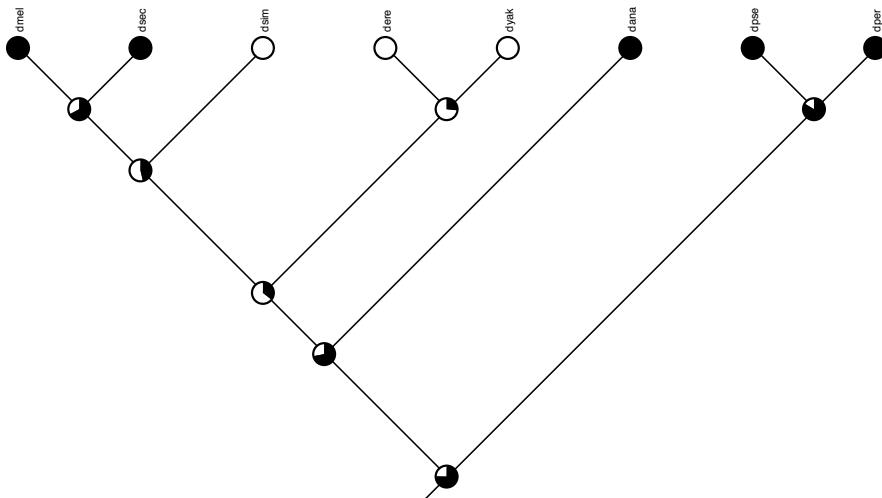

Figure 34: 2L:12986910-12987539 CG5075



Figure 35: 3R:7296770-7297279 CG17230



Figure 36: 3R:8104440-8105249 svp

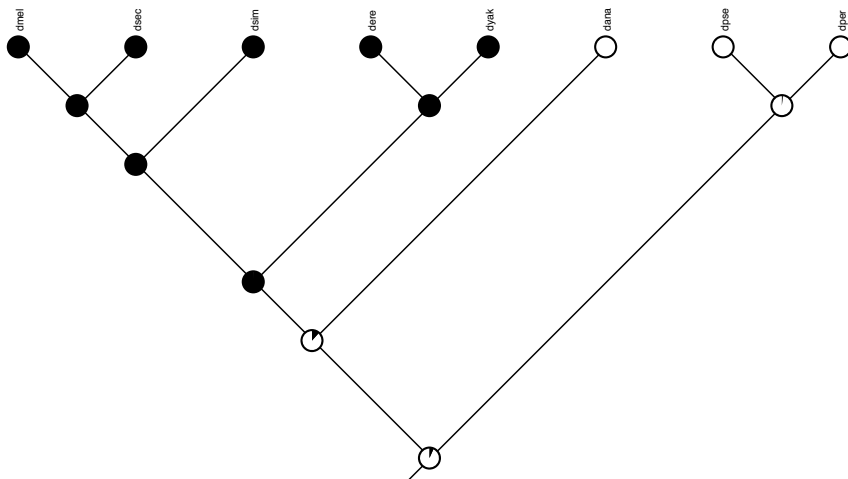

Figure 37: 3R:8837630-8838559 CtBP

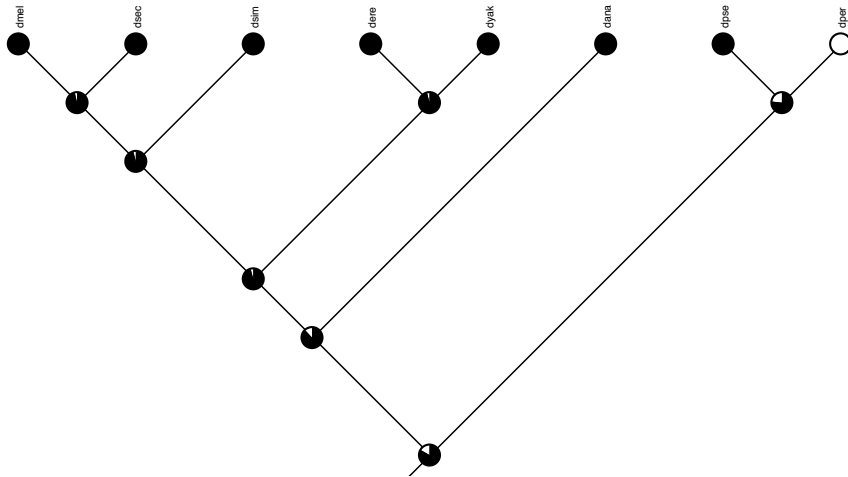

Figure 38: 3R:10604850-10605369 CG3563



Figure 39: 3R:11222160-11222899 CG31302



Figure 40: 3R:11947050-11947549 Sb

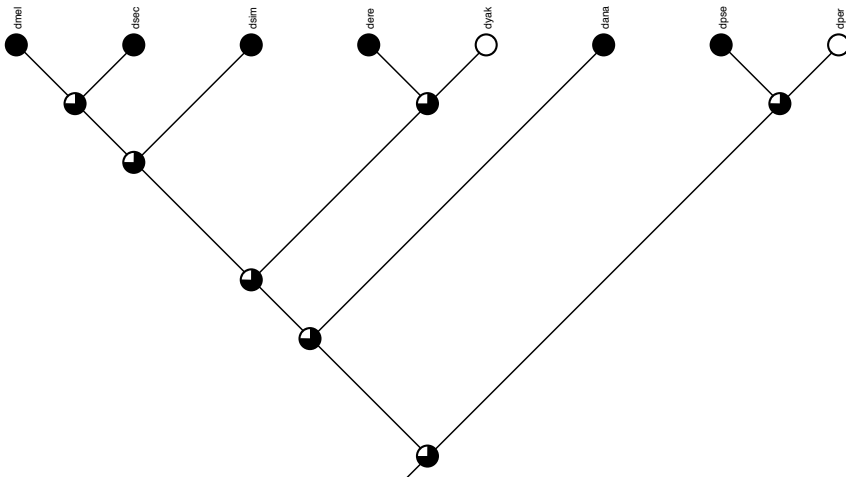

Figure 41: 3R:14524740-14526129 CG7710

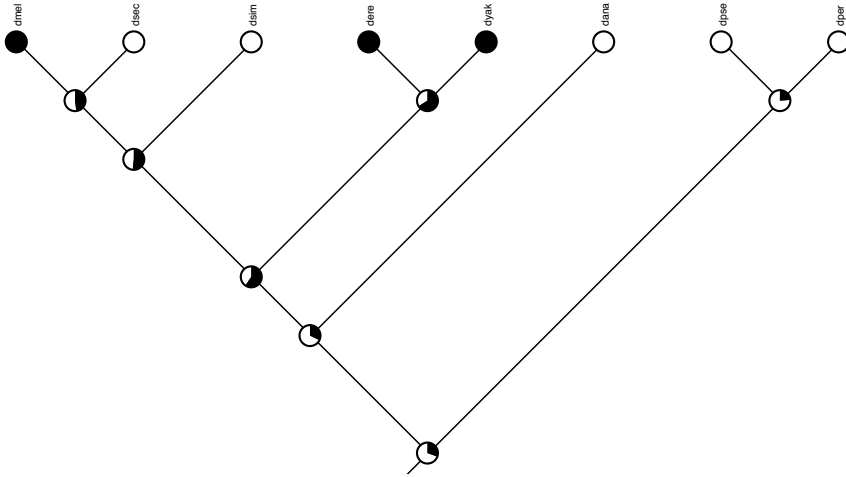

Figure 42: 3R:14538050-14538809 VChT

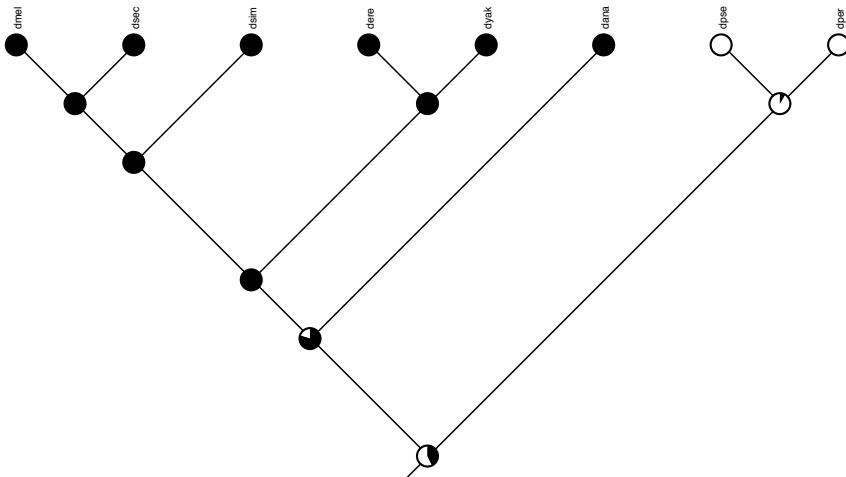

Figure 43: 3R:17271900-17272449 lbe

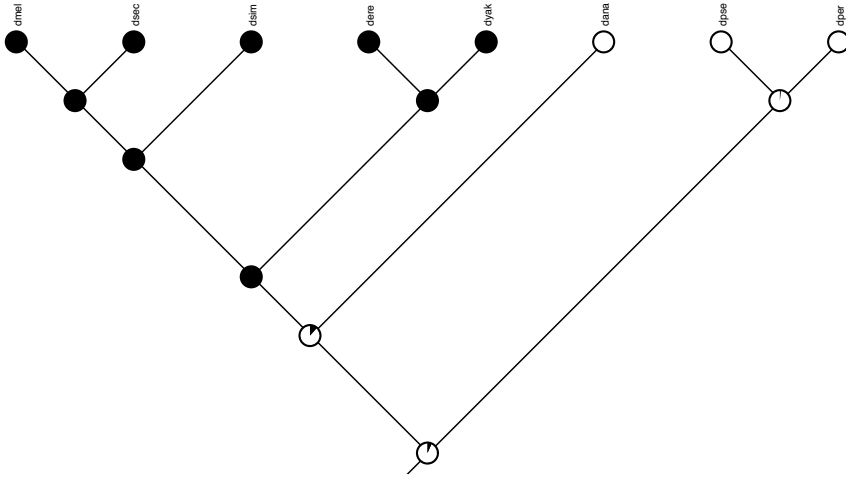

Figure 44: 3R:22415140-22415789 scrib

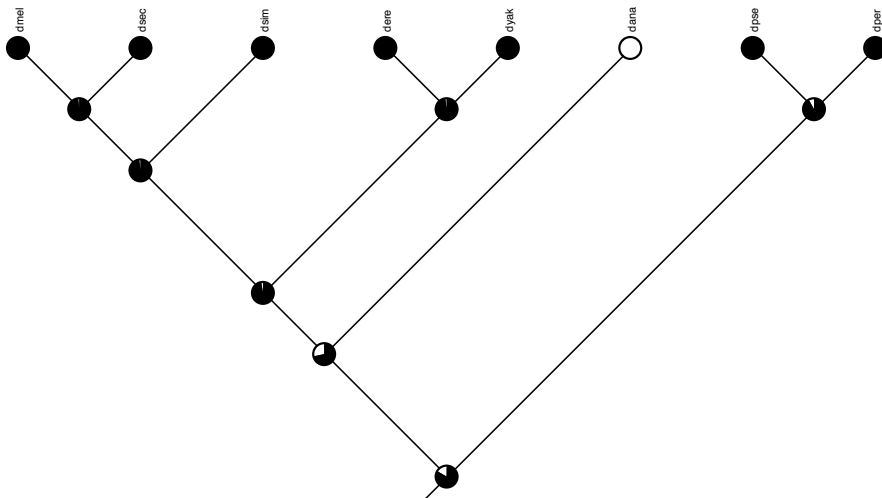

Figure 45: 2L:13098100-13098639 CG5142



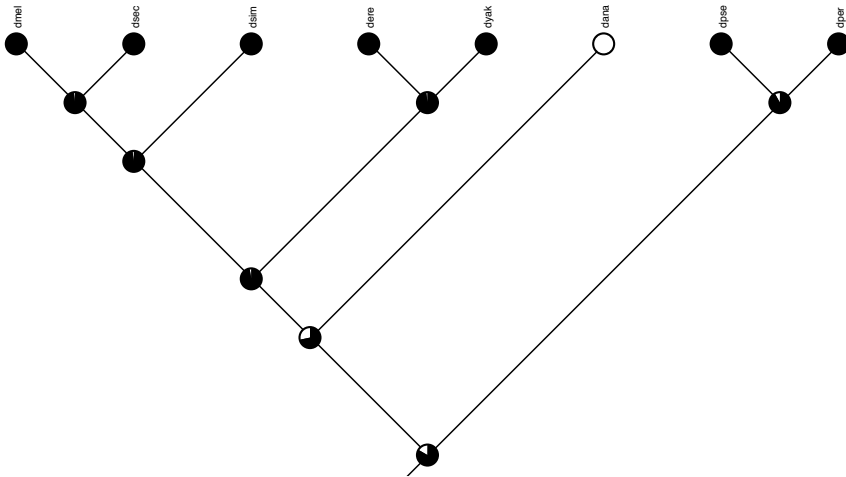

Figure 46: 3R:23989520-23990089 CG12425

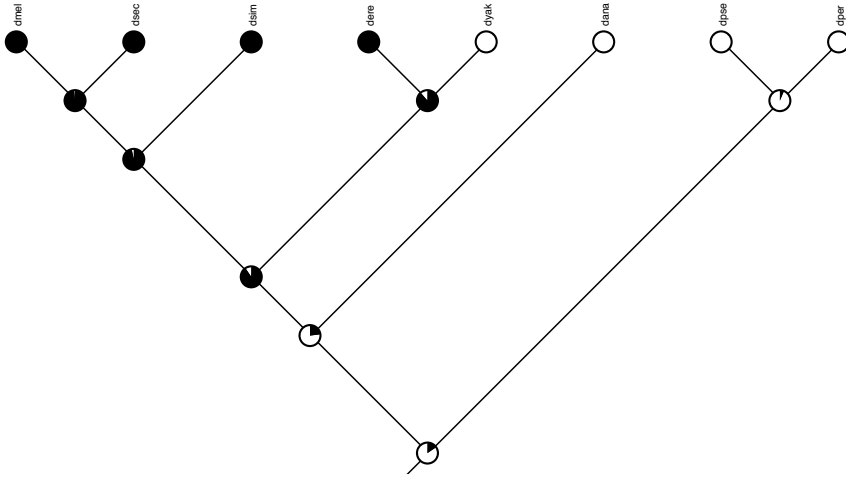

Figure 47: 3R:24069750-24070279 CG12852



Figure 48: 3R:24074310-24074839 CG12852

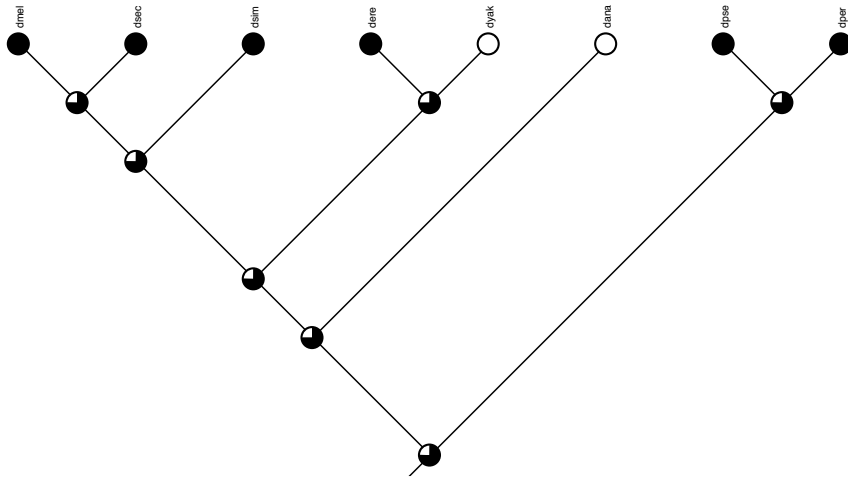

Figure 49: 3R:26562800-26563559 CG15543

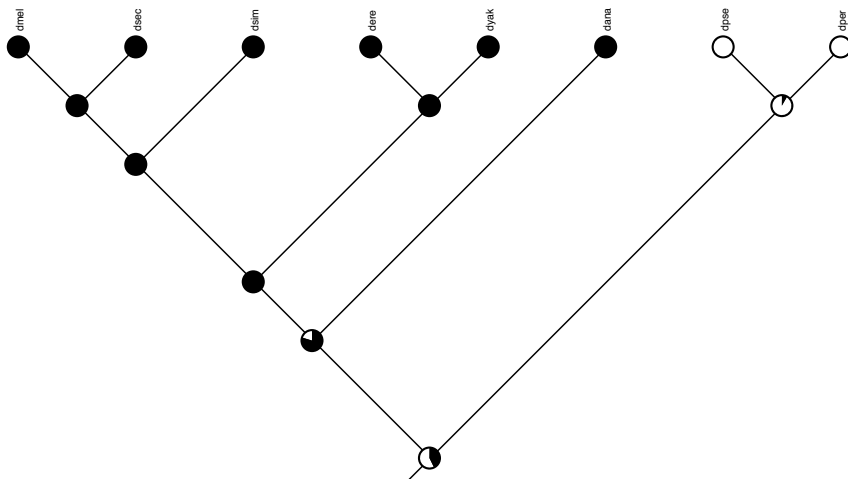

Figure 50: 3R:27363230-27363909 CG1499





Figure 53: X:8041710-8042469 sdt

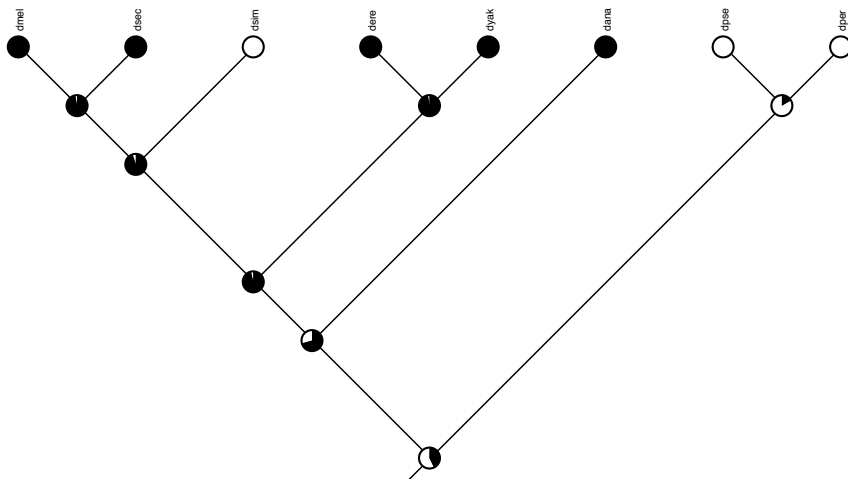

Figure 54: X:8171430-8172269 nAcRalpha-7E

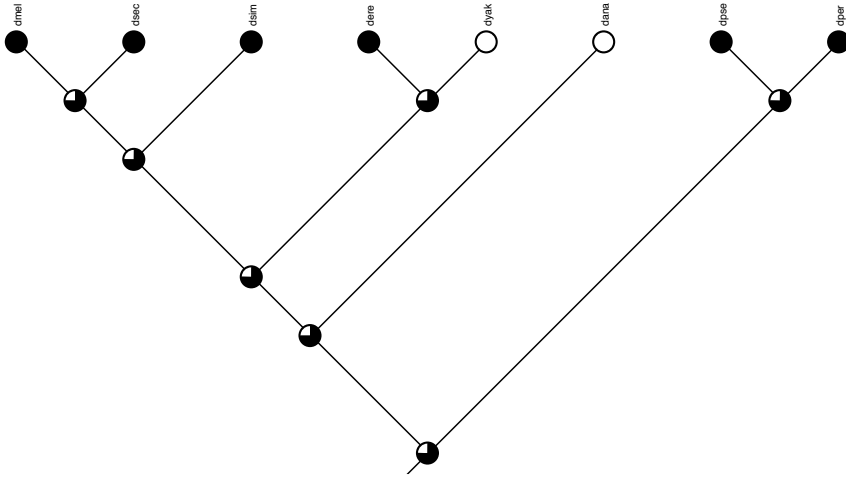

Figure 55: X:8324250-8324869 CG33223

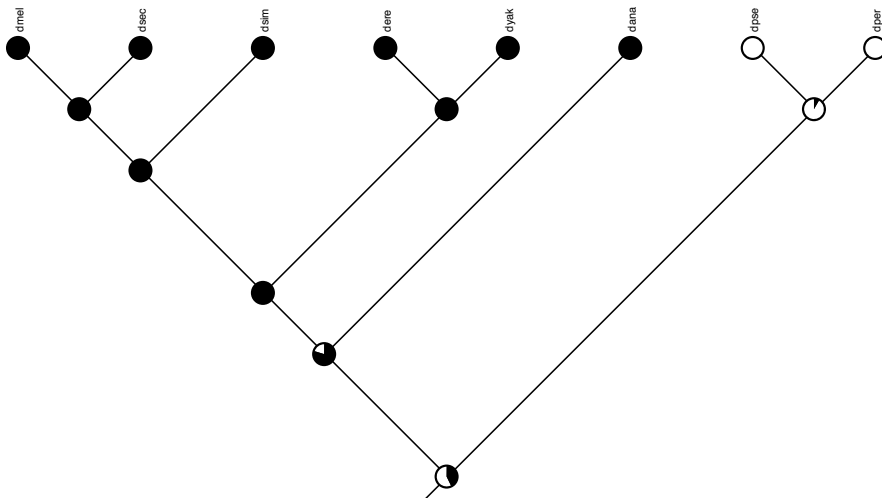

Figure 56: 2L:16982270-16983139 beat-IIIb



Figure 57: X:8769530-8770209 rdgA

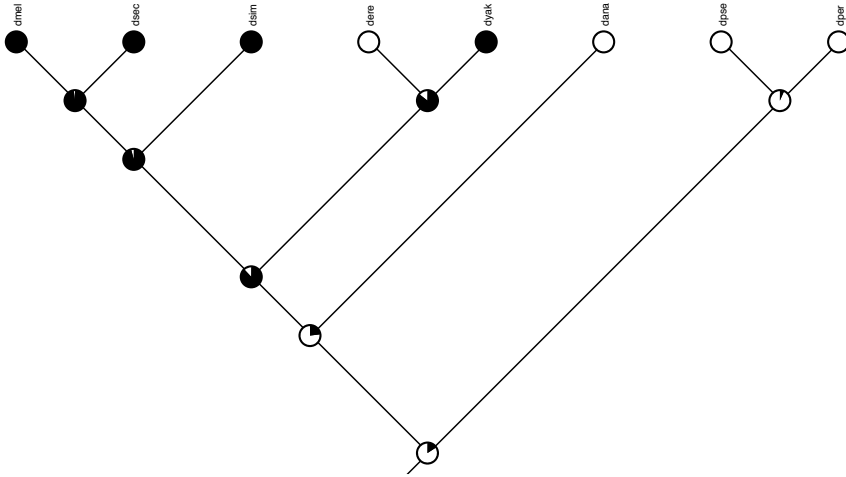

Figure 58: X:9430870-9431389 Hex-A

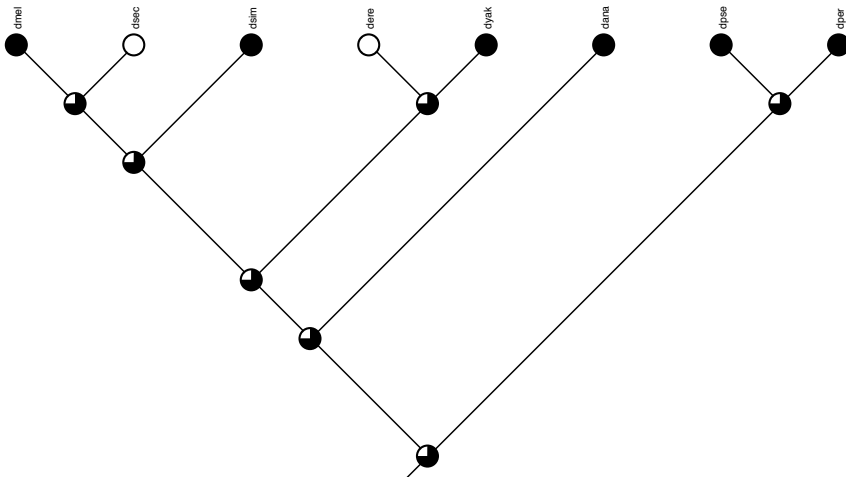

Figure 59: X:9691870-9692389 CG32698



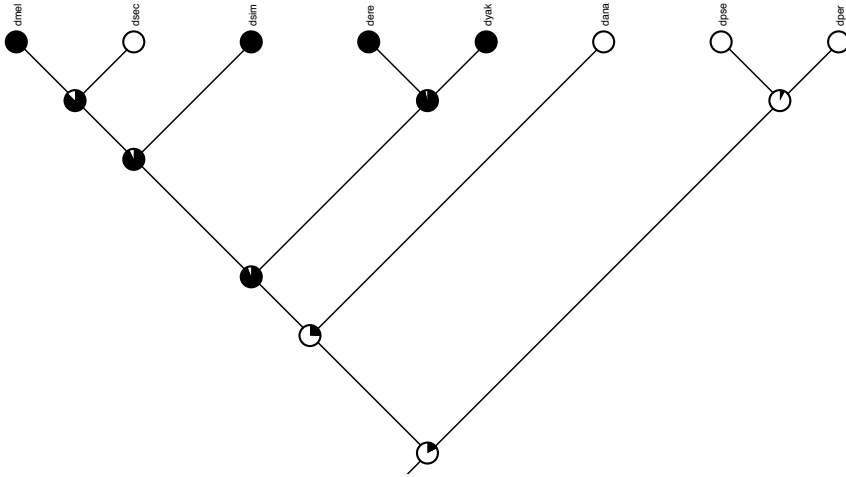

Figure 60: X:9767360-9768219 Idgf4

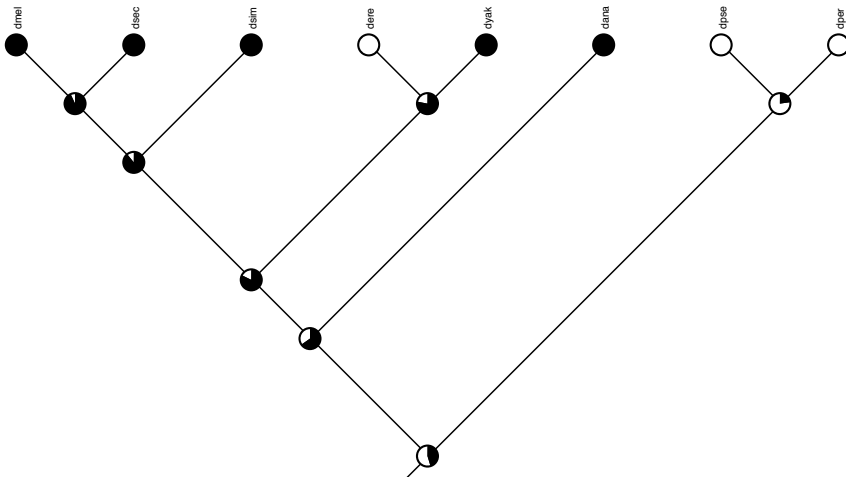

Figure 61: X:10862540-10863149 CG12626

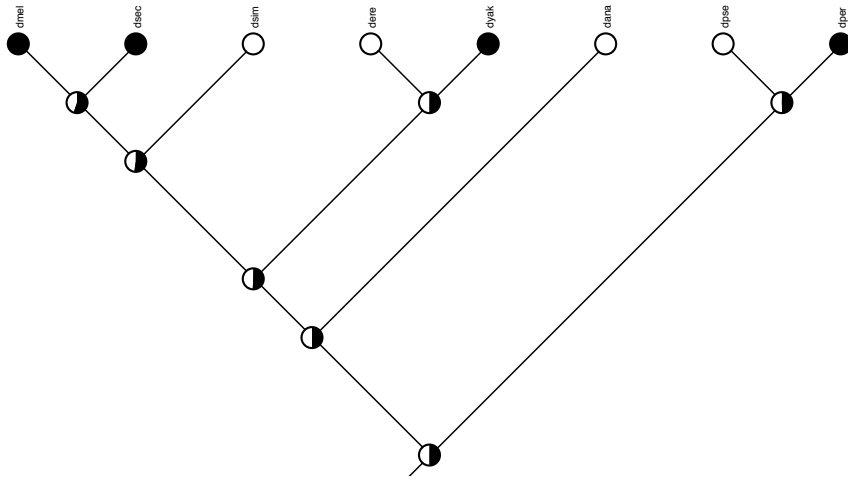

Figure 62: X:10948390-10949239 CG1961



Figure 63: X:11097230-11098069 CG15198

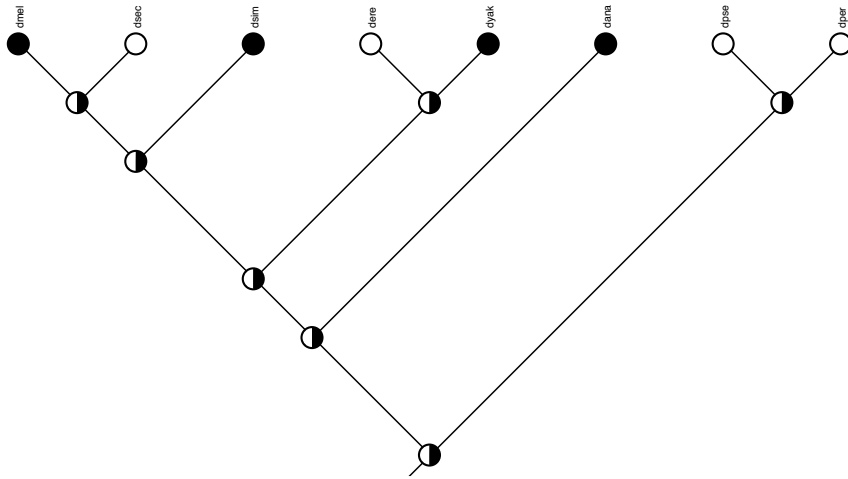

Figure 64: X:11974910-11975689 CG2750

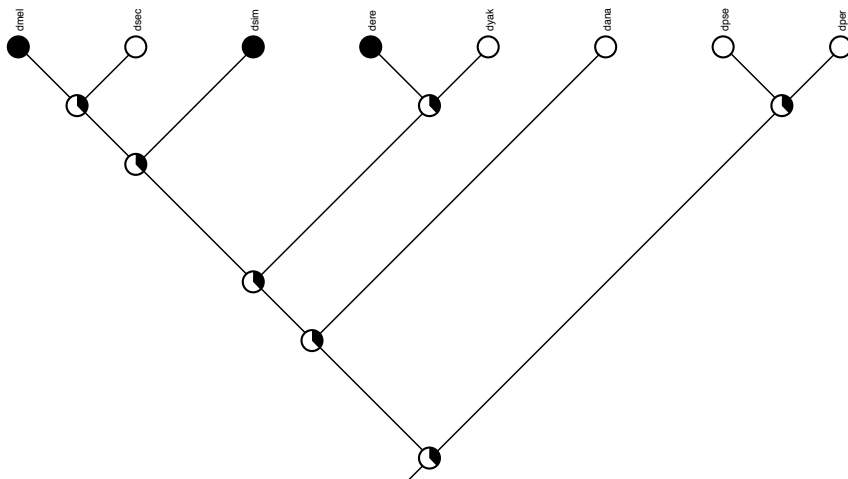

Figure 65: X:12449570-12450279 CG2543





Figure 68: X:17191780-17192529 B-H2

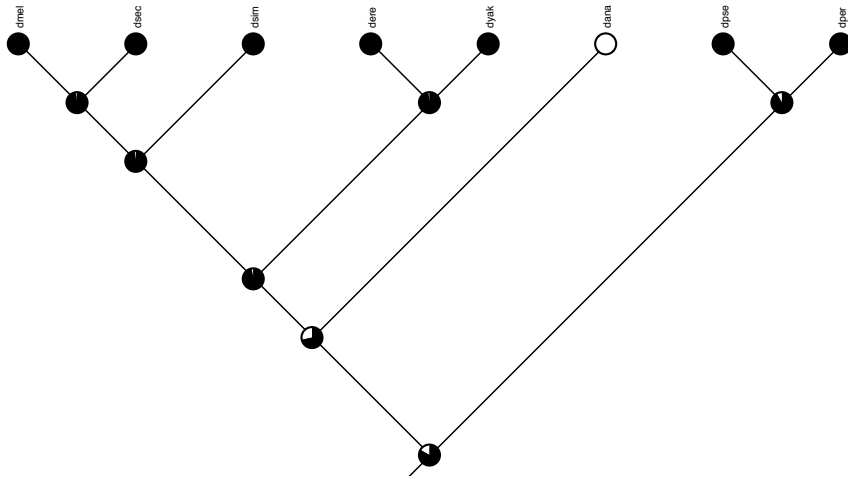

Figure 69: X:17216120-17216839 B-H1

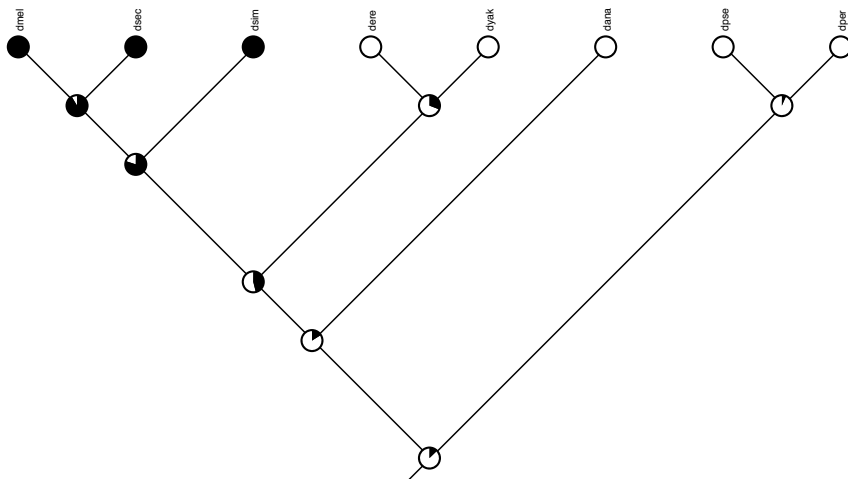

Figure 70: X:18757770-18758559 CG32541



Figure 71: X:20825720-20826239 CG10998



Figure 72: 2R:5490190-5491169 eve
